# Supplementary material for: Effect of Protein Kinase Cβ Inhibition on Renal Hemodynamic Function and Urinary Biomarkers in Humans With Type 1 Diabetes: A Pilot Study
Source: Oxford University Press journal article supplement (doi:10.2337/dc08-1609), 2008-10-23
Supplement: dc081609-sup-1609_online_appendix.doc [file dc081609-sup-1609_online_appendix.doc]

| Inclusion Criteria | Exclusion Criteria |
| --- | --- |
| 1. Men and women >18 years of age  2. Type 1 diabetes mellitus  3. Elevated urinary albumin to creatinine ratio (>2.0 mg/mmol in men and >2.8 mg/mmol in women on 2/3 spot urine samples)  4. Estimated creatinine clearance 80 ml/minute  5. HbA1C 6 to 10%  6. No language barrier  7. Can provide informed consent | 1. Renal transplantation  2. Clinical evidence of macrovascular disease  3. Women of childbearing potential, no alternate  contraception  4. Women taking oral contraceptive or hormone  replacement therapies  5. Alcohol/tobacco products within 48 hours  6. Other medications that strongly inhibit the P-  450 system (for >2 weeks) |

**Table A1: Inclusion and exclusion criteria**

**Table A2: Baseline Characteristics (meanSEM)**

| **Parameter** | **RBX** | **Placebo** |
| --- | --- | --- |
|  | n=13 | n=7 |
| Males/Females (number) | 10/3 | 6/1 |
| Age (years) | 39±2 | 40±4 |
| Body surface area | 2.1±0.1 | 2.0±0.1 |
| Hemoglobin A1C | 0.079±0.003 | 0.079±0.005 |
| Diabetes Duration (years) | 25.8±2.0 | 26.6±3.5 |
| Sodium excretion (mmol/day) | 169±22 | 164±24 |
| Protein intake (g/kg/day) | 1.04±0.30 | 1.09±0.25 |
| Weight (kg) | 87±4 | 81±4 |

**Table A3: Response to RBX During Clamped Hyperglycemia (meanSEM)**

| **Parameter** | **RBX – Hyperglycemia** | | **Placebo - Hyperglycemia** | |
| --- | --- | --- | --- | --- |
|  | Pre-RBX | Post-RBX | Pre-Placebo | Post-Placebo |
| MAP | 96±2 | 96±3 | 92±5 | 86±4 |
| ERPF | 578±69 | 491±43* | 588±44 | 538±49 |
| GFR | 122±9 | 123±9 | 140±7 | 124±5 |
| FF | 0.23±0.02 | 0.26±0.02* | 0.26±0.02 | 0.24±0.02 |
| RBF | 930±105 | 770±60* | 910±65 | 843±78 |
| RVR | 118±11 | 133±9 | 104±10 | 109±13 |

MAP = mean arterial pressure (mmHg), GFR = glomerular filtration rate (ml/minute/1.73 m2), ERPF = effective renal plasma flow, (ml/minute/1.73 m2), FF = filtration fraction, RBF = renal blood flow (ml/minute/1.73 m2), RVR = renal vascular resistance (mmHg/L/minute).

*p<0.05 compared to *within group* baseline parameter

**Electronic Figure A1, panels A-C: Urinary Biomarker Responses to RBX (meanSEM)**

**Panel A**

**
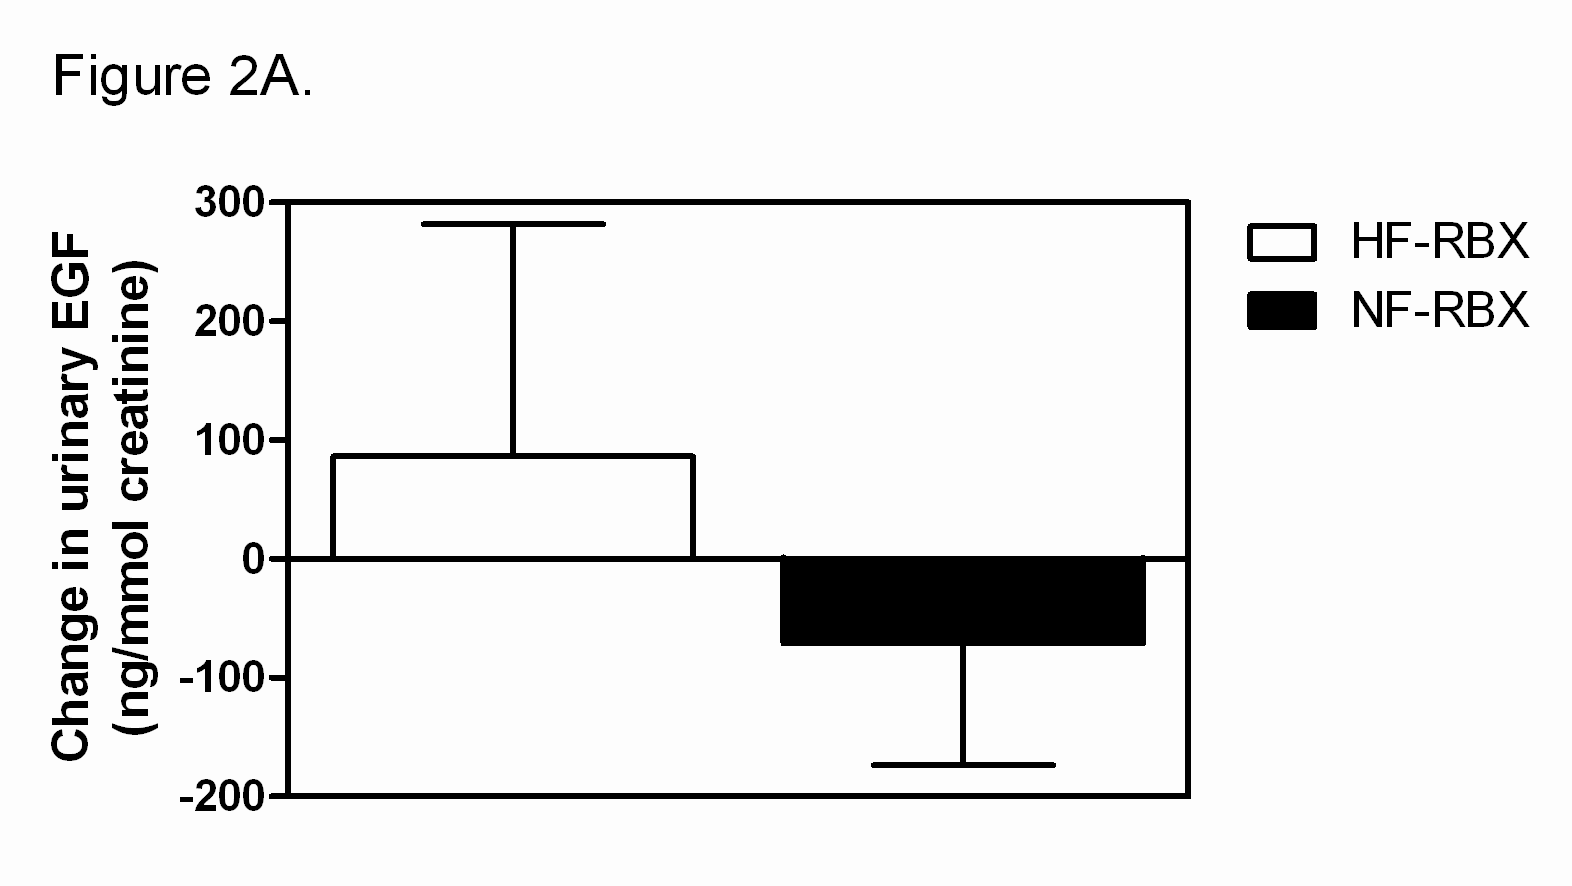
**

**Panel B**

**
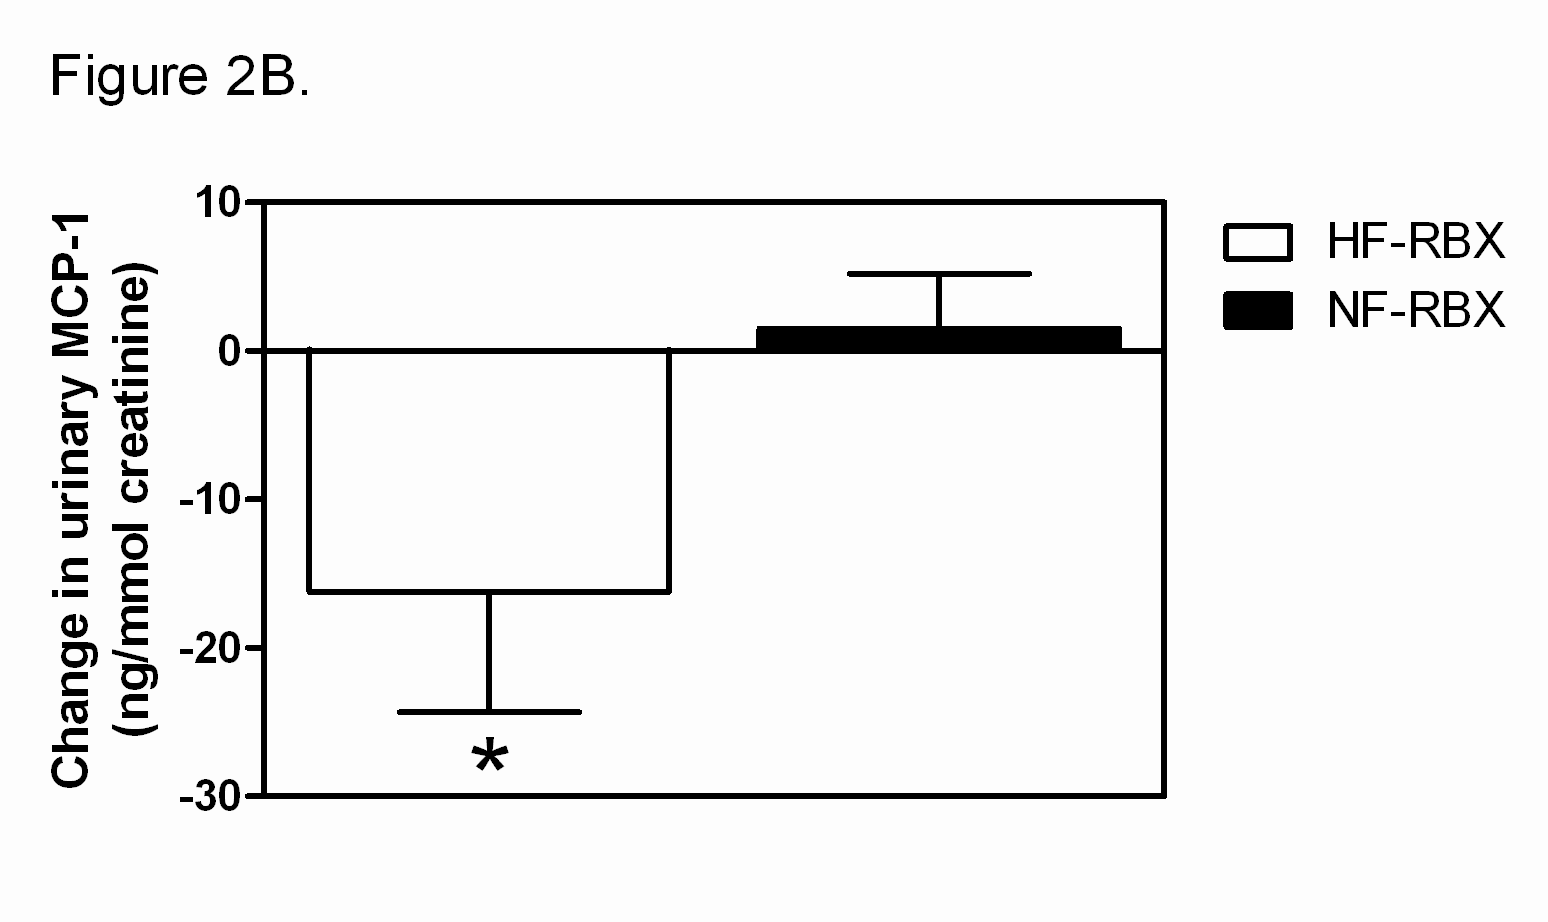
**

**Panel C**

**
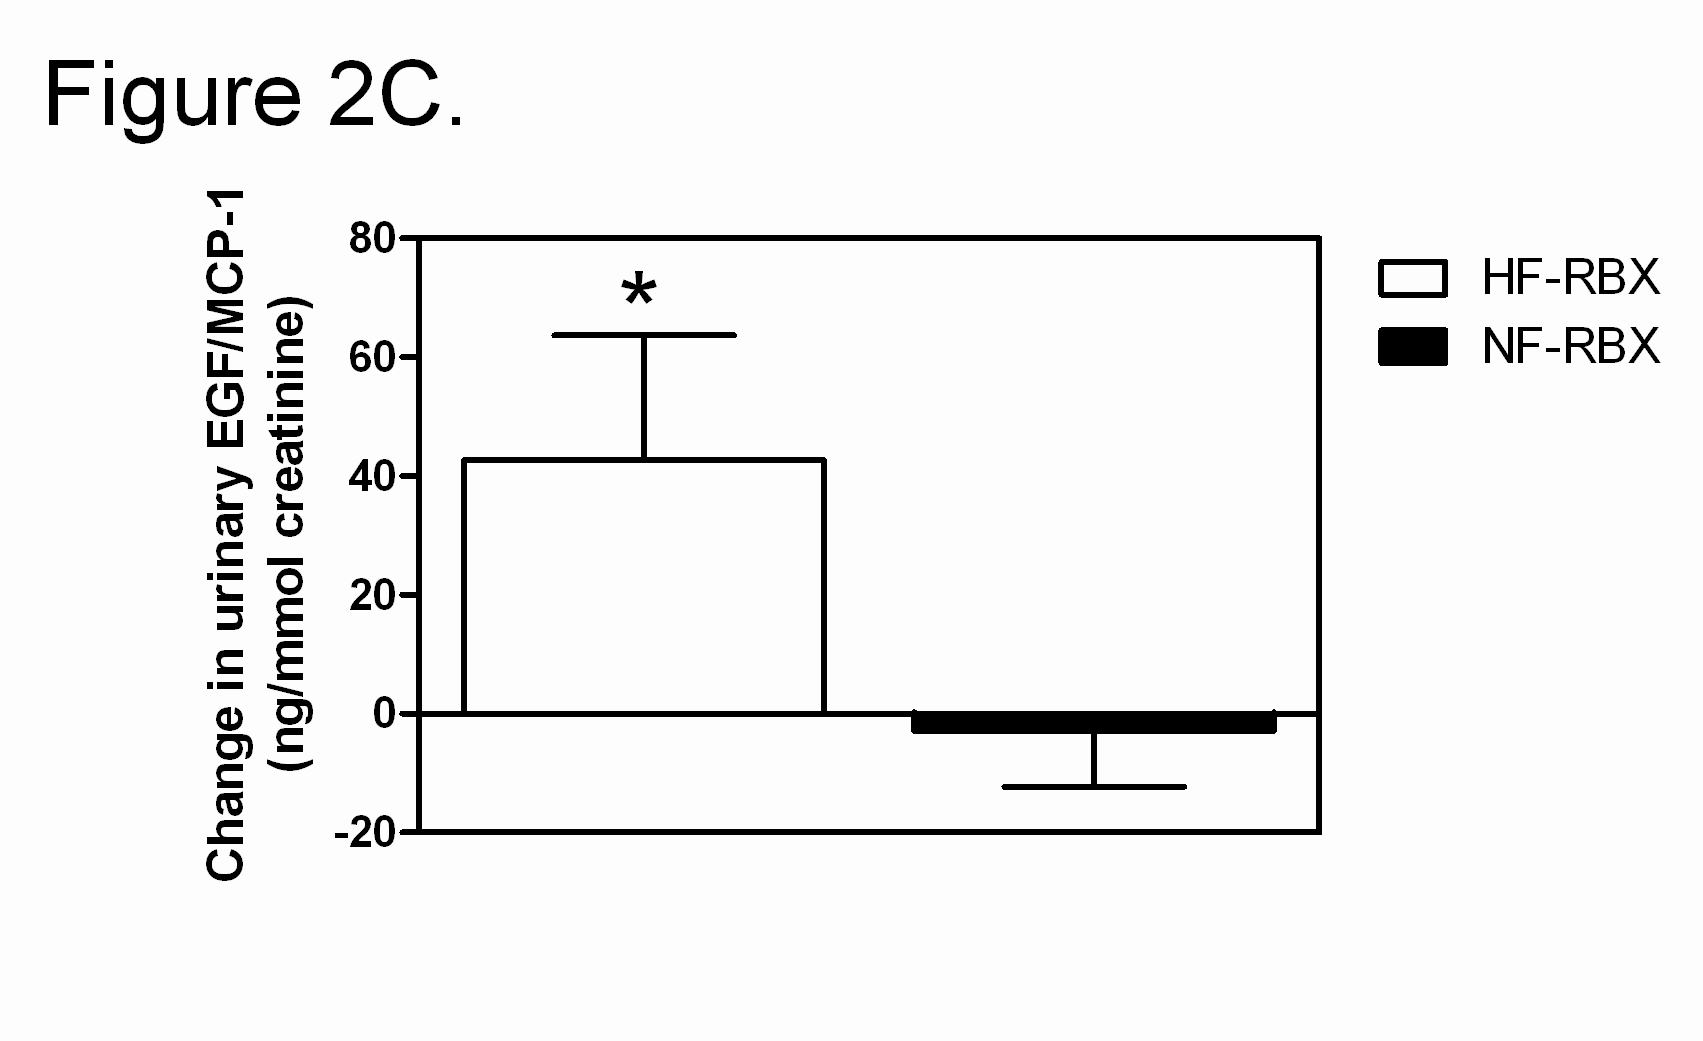
**

* p<0.05 for the response in HF vs. NF subjects
